# Supplementary material
Source: publisher figshare collection journal article supplement (https://aacr.figshare.com/articles/dataset/_/22645247)

# Supplementary Figure 5

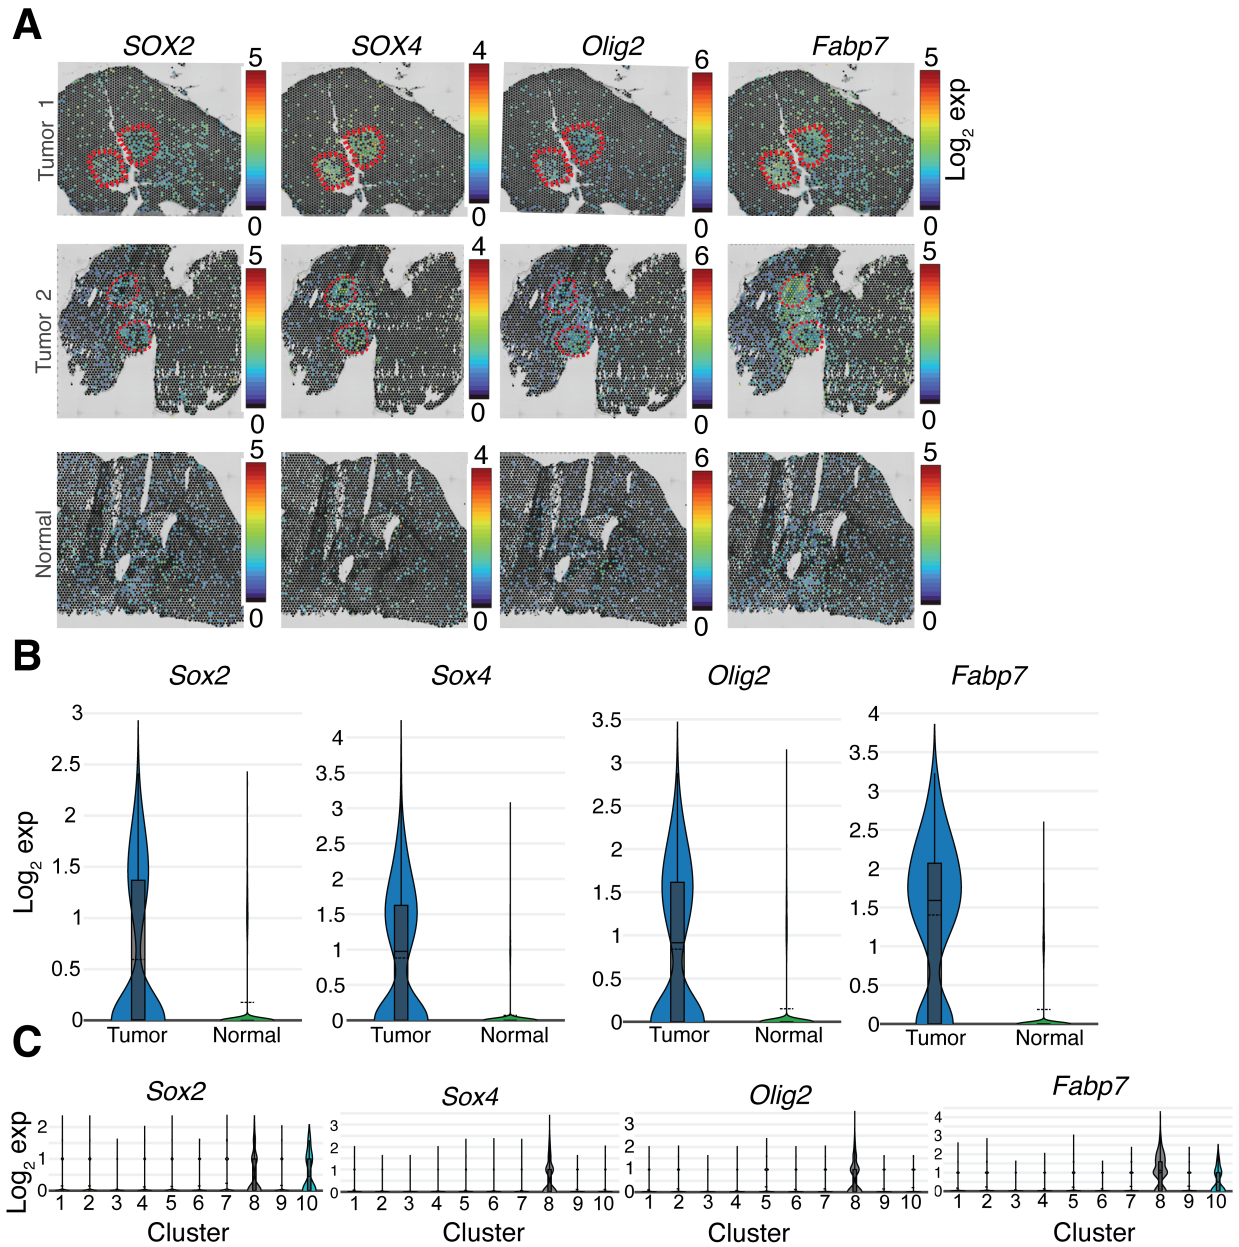

Supplement: Supplementary file 1 [file 40197983]
